# Supplementary material
Source: MDPI journal article supplement (https://www.mdpi.com/1996-1073/13/1/80)
Supplement: s1 [file s1]

Article

# Environmental Payback of Renovation Strategies in a Northern Climate—the Impact of Nuclear Power and Fossil Fuels in the Electricity Supply

Ricardo Ramírez-Villegas <sup>1,2,\*</sup>, Ola Eriksson <sup>2</sup> and Thomas Olofsson <sup>3</sup>

<sup>1</sup> School of Technology and Business Studies, Dalarna University, 791 88 Falun, Sweden

<sup>2</sup> Faculty of Engineering and Sustainable Development, University of Gävle, 801 76 Gävle, Sweden; ola.eriksson@hig.se

<sup>3</sup> Department of Applied Physics and Electronics, Umeå University, 901 87 Umeå, Sweden; Thomas.olofsson@umu.se

\* Correspondence: rrv@du.se; Tel.: +46-76-100-1745

Received: 27 November 2019 Accepted: 20 December 2019; Published: 23 December 2019

**Table S1.** Case Study Building Information.

| Basic Information          |                                          |
|----------------------------|------------------------------------------|
| Latitude                   | 60,49 N                                  |
| Longitude                  | 16,4 E                                   |
| Elevation (m)              | 153                                      |
| Number of storeys          | 3                                        |
| Total heated are (m2)      | 2822                                     |
| Building gross volume (m3) | 8387                                     |
| Number of apartments       | 36                                       |
| Type of heating system     | Hydronic heating system. District System |
| Type of ventilation        | Mechanical exhaust ventilation           |
| Total U-Value (W/K m2)     | 1,47                                     |
| Heat demand (KWh/m2 year)  | 152                                      |

**Table S2.** Renovations Scenarios.

| Renovation scenario | Outer walls                    | Unheated Attic                 | Windows         | Ventilation               | Heating source       | Others                    |
|---------------------|--------------------------------|--------------------------------|-----------------|---------------------------|----------------------|---------------------------|
| 0                   | 120 mm mineral wool insulation | 150 mm mineral wool insulation | Double casement | Mechanical                | District Heating     |                           |
| 1                   | 120 mm mineral wool insulation | 150 mm mineral wool insulation | Double casement | Mechanical                | District Heating     | Photovoltaic panel system |
| 2                   | 120 mm mineral wool insulation | 150 mm mineral wool insulation | Double casement | Mechanical                | Geothermal Heat Pump |                           |
| 3                   | 120 mm mineral wool insulation | 150 mm mineral wool insulation | Double casement | Heat Recovery Ventilation | District Heating     |                           |

|   |                                |                                |                                          |                           |                      |                     |
|---|--------------------------------|--------------------------------|------------------------------------------|---------------------------|----------------------|---------------------|
| 4 | 120 mm mineral wool insulation | 150 mm mineral wool insulation | Double casement                          | Heat Recovery Ventilation | Geothermal Heat pump | Photovoltaic Panels |
| 5 | 480 mm mineral wool insulation | 300 mm mineral wool insulation | 3-glass argon filled low emissivity pane | Mechanical                | District Heating     | Photovoltaic panes  |
| 6 | 480 mm mineral wool insulation | 300 mm mineral wool insulation | 3-glass argon filled low emissivity pane | Mechanical                | Geothermal Heat pump |                     |
| 7 | 480 mm mineral wool insulation | 300 mm mineral wool insulation | 3-glass argon filled low emissivity pane | Heat recovery ventilation | District Heating     |                     |
| 8 | 480 mm mineral wool insulation | 300 mm mineral wool insulation | 3-glass argon filled low emissivity pane | Heat recovery ventilation | Geothermal Heat pump | Photovoltaic panes  |

Table S3. Greenhouse gas emissions (GHG) emission factors for DH 2016.

| GHG Emissions (g CO <sub>2</sub> eq/kWh) | Borlänge Energi | Göteborg Energi |
|------------------------------------------|-----------------|-----------------|
| Total Emissions                          | 66              | 79              |
| Combustion                               | 62              | 69              |
| Fuel transport and production            | 4               | 10              |

Table S4. End of life scenarios.

| Material group                         | Material group                   | Materials included                                                                                    | C3 – C4, waste processing and landfilling               | D, recycling benefits                                  |
|----------------------------------------|----------------------------------|-------------------------------------------------------------------------------------------------------|---------------------------------------------------------|--------------------------------------------------------|
| Mineral building materials             | Recycling for ground works       | Concrete, Cement, Bricks, Porcelain, Plaster, Clay products, Stone, Ceramics, Asphalt                 | C3: Construction waste preparation for recycling        | Recycling benefit from replacing the primary gravel    |
| Metals                                 | Metal preparation and recycling  | Aluminum, Steel, Stainless steel, Galvanized steel, Copper coated, Copper uncoated, Brass, Zinc, Lead | C3: Metal waste preparation                             | Recycling benefits for replacing virgin metal          |
| Bio based materials with heating value | Incineration and energy recovery | Wood, Wood products                                                                                   | C3: Construction waste incineration for energy recovery | Recovered energy (replacing average energy production) |

|                                                                   |                                          |                                                                                                             |                                                         |                                                        |
|-------------------------------------------------------------------|------------------------------------------|-------------------------------------------------------------------------------------------------------------|---------------------------------------------------------|--------------------------------------------------------|
| Other materials with heating value                                | Incineration and energy recovery         | Plastics                                                                                                    | C3: Construction waste incineration for energy recovery | Recovered energy (replacing average energy production) |
| Other materials that can be landfilled in construction waste site | Disposal / landfilling of inert material | Coatings, Synthetic materials, Panels and boards, Insulating materials, Glass, Window and façade components | Disposal of inert construction waste                    | -                                                      |

**Table S5.** Electricity production by fuel (%) 2018.

| Country | Nuclear | Oil | Waste | Hydro | Solar PV | Wind | Biofuels | Coal | Gas  |
|---------|---------|-----|-------|-------|----------|------|----------|------|------|
| Sweden  | 40,4    | 0,3 | 2,1   | 39,8  | 0,1      | 9,9  | 6,3      | 0,7  | 0,4  |
| Denmark | 0       | 1,1 | 5,1   | 0,1   | 2,4      | 41,9 | 13,3     | 29   | 7,1  |
| Norway  | 0       | 0   | 0,3   | 96,4  | 0        | 1,4  | 0        | 0,1  | 1,7  |
| Estonia | 0       | 2,1 | 1,1   | 0     | 0        | 4,9  | 7,3      | 83,8 | 0    |
| Finland | 33,9    | 0,3 | 1,4   | 23,1  | 0        | 4,5  | 16,1     | 15,3 | 5,5  |
| Germany | 13,1    | 0,9 | 2     | 4     | 5,9      | 12,1 | 7        | 42,2 | 12,7 |

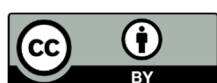

© 2019 by the authors. Submitted for possible open access publication under the terms and conditions of the Creative Commons Attribution (CC BY) license (<http://creativecommons.org/licenses/by/4.0/>).
